# Supplementary material for: Applying Nutrient Profiling Systems to Packaged Foods and Drinks Sold in Jamaica
Source: PubMed Central journal article supplement (PMC7022911; doi:10.3390/foods9010065), 2020-01-08
Supplement: foods-09-00065-s001.pdf [file foods-09-00065-s001.pdf]

Figure S1: Algorithm used to evaluate Jamaican products for PAHO nutrient profiling system

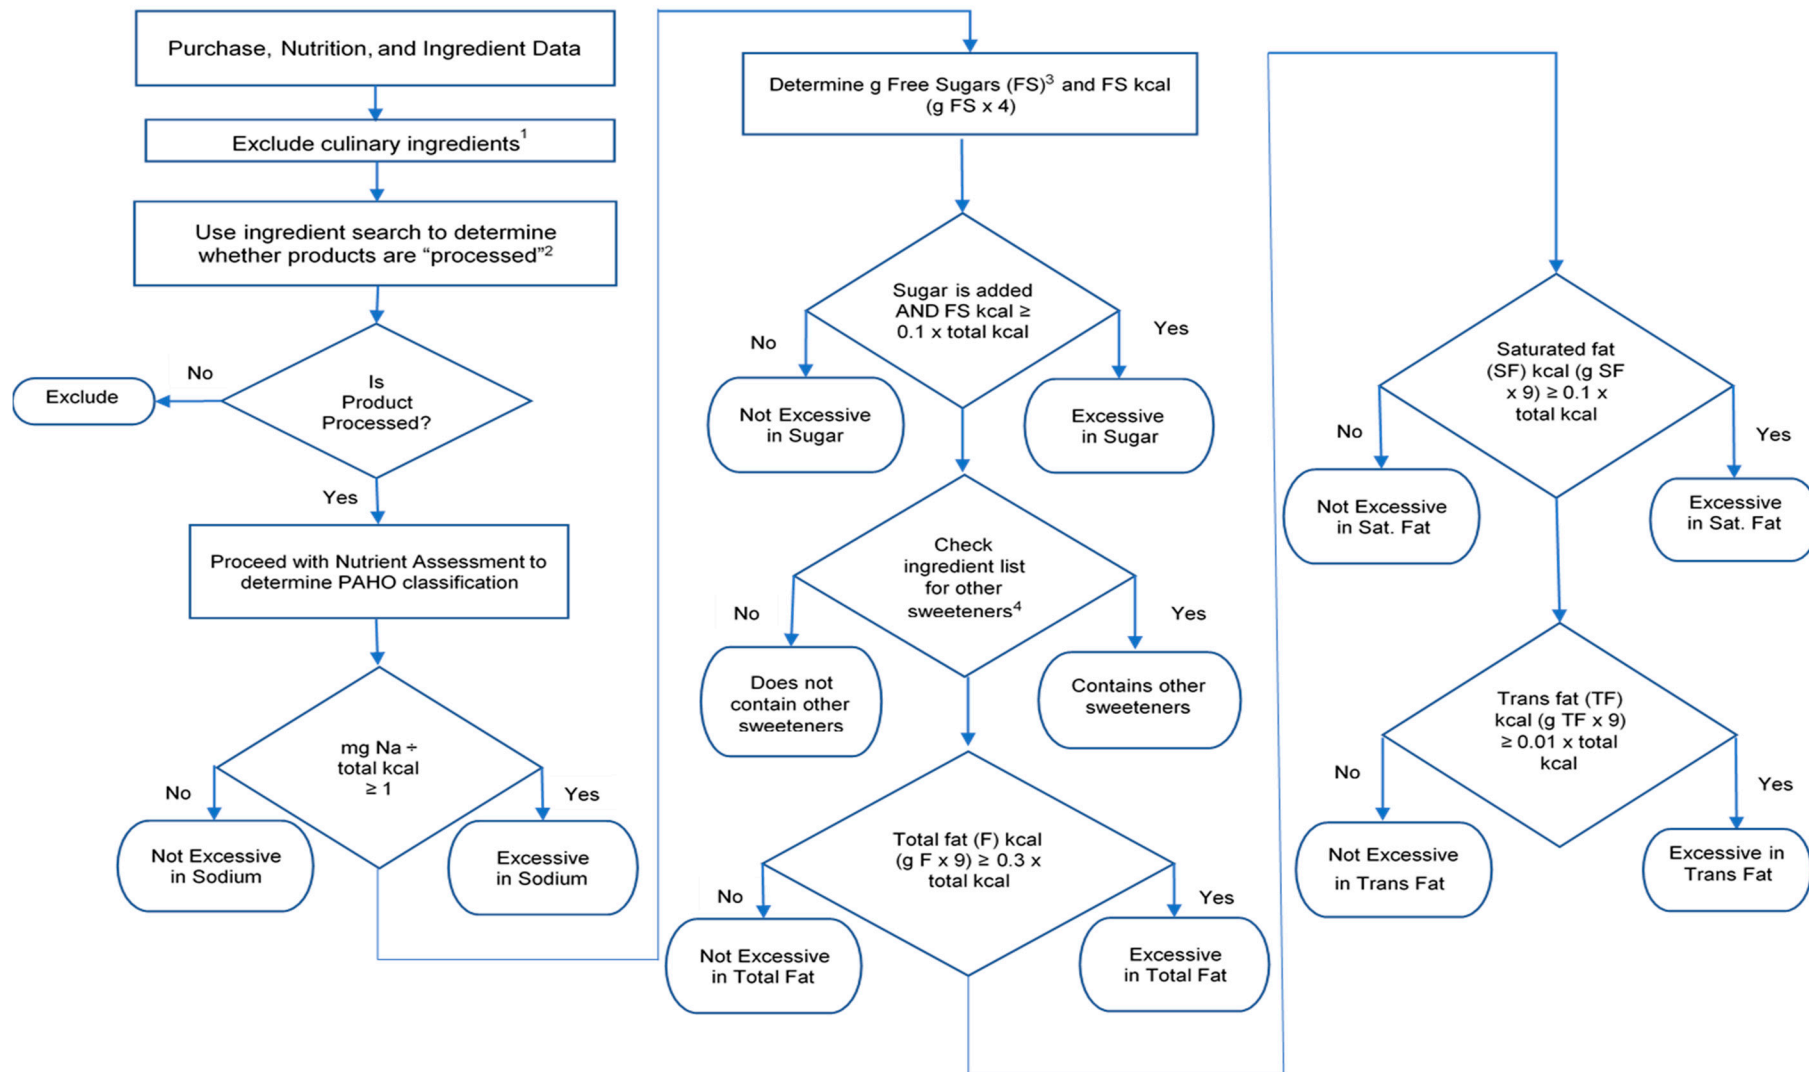

Notes for PAHO nutrient profile

1. Exclude Culinary Ingredients

| Examples of Products Excluded as Culinary Ingredients |
|-------------------------------------------------------|
| Oils                                                  |
| Butter                                                |
| Caloric Sweeteners                                    |
| Low Calorie Sweeteners                                |
| Other Sweeteners                                      |

2. Search product ingredients using lists of ingredients representing added fats, sugars, artificial sweeteners, and salt. Lists of ingredients developed by Global Food Research Program based on various food databases, food manufacturing ingredients, policies, and regulations. Presence of any of these components indicates product is processed. Food items containing no additional ingredients are excluded.

3. Steps for estimating Free Sugars (FS) [only for processed products]:

- a. If product contains 0g Total Sugar, set FS = 0g
- b. If product contains >0g Total Sugar, Global Food Research Program nutritionists review categories & products to confirm or reassign FS value
  - i. Categories requiring nutritionist review: (may contain fruit/milk in the ingredient list, necessitating change in FS value)

|                               |                             |
|-------------------------------|-----------------------------|
| Coffee                        | Desserts                    |
| Tea                           | Candy - Chocolate           |
| Dairy drinks                  | Candy - Non Chocolate       |
| Meal Replacement/Supplements  | Other Sweets                |
| Syrups                        | Ready-to-eat baby foods     |
| Other Beverages               | Other Dairy                 |
| Sweet Baked Goods             | Dried fruits                |
| Other Bakery Products         | Other Fruits and Vegetables |
| Breakfast cereals             | Sweet Sauces & Spreads      |
| Granola bars                  | Nuts & Seeds                |
| Other Cereal & Grain Products | Plantain/Banana Chips       |
| Ice creams                    | Non-dairy creams            |
| Sorbet                        | Other Sweeteners            |

ii. Note – PAHO Rules for determining FS:

| <b>Method for estimating free sugars based on the amount of total sugars declared on food/beverage product packaging</b> |                                            |                                                                                                                |
|--------------------------------------------------------------------------------------------------------------------------|--------------------------------------------|----------------------------------------------------------------------------------------------------------------|
| <b>If the manufacturer declares...</b>                                                                                   | <b>Then estimated free sugars equal...</b> | <b>Examples of products</b>                                                                                    |
| 0g of total sugars                                                                                                       | 0g                                         | Canned fish                                                                                                    |
| added sugars                                                                                                             | declared added sugars                      | Any product that declares added sugars                                                                         |
| total sugars, and the product is part of a group of foods with no or a minimal amount of naturally occurring sugars      | declared total sugars                      | Regular soft drinks, sport drinks, sweet biscuits, breakfast cereals, chocolate, and savory and sweet biscuits |
| total sugars and the product is yogurt or milk, with sugars in the list of ingredients                                   | 50% of declared total sugars               | Flavored milk or yogurt                                                                                        |
| total sugars, and the product is a processed fruit item with sugars in the list of ingredients                           | 50% of declared total sugars               | Fruit in syrup                                                                                                 |
| total sugars, and the product has milk or fruit in the list of ingredients                                               | 75% of declared total sugars               | Cereal bar with fruit                                                                                          |

4. Search product ingredients using lists of ingredients representing added fats, sugars, artificial sweeteners, and salt. Lists of ingredients developed by Global Food Research Program based on various food databases, food manufacturing ingredients, policies, and regulations.

**Figure S2:** Algorithm used to evaluate Jamaican products for Chile Stage III nutrient profiling system

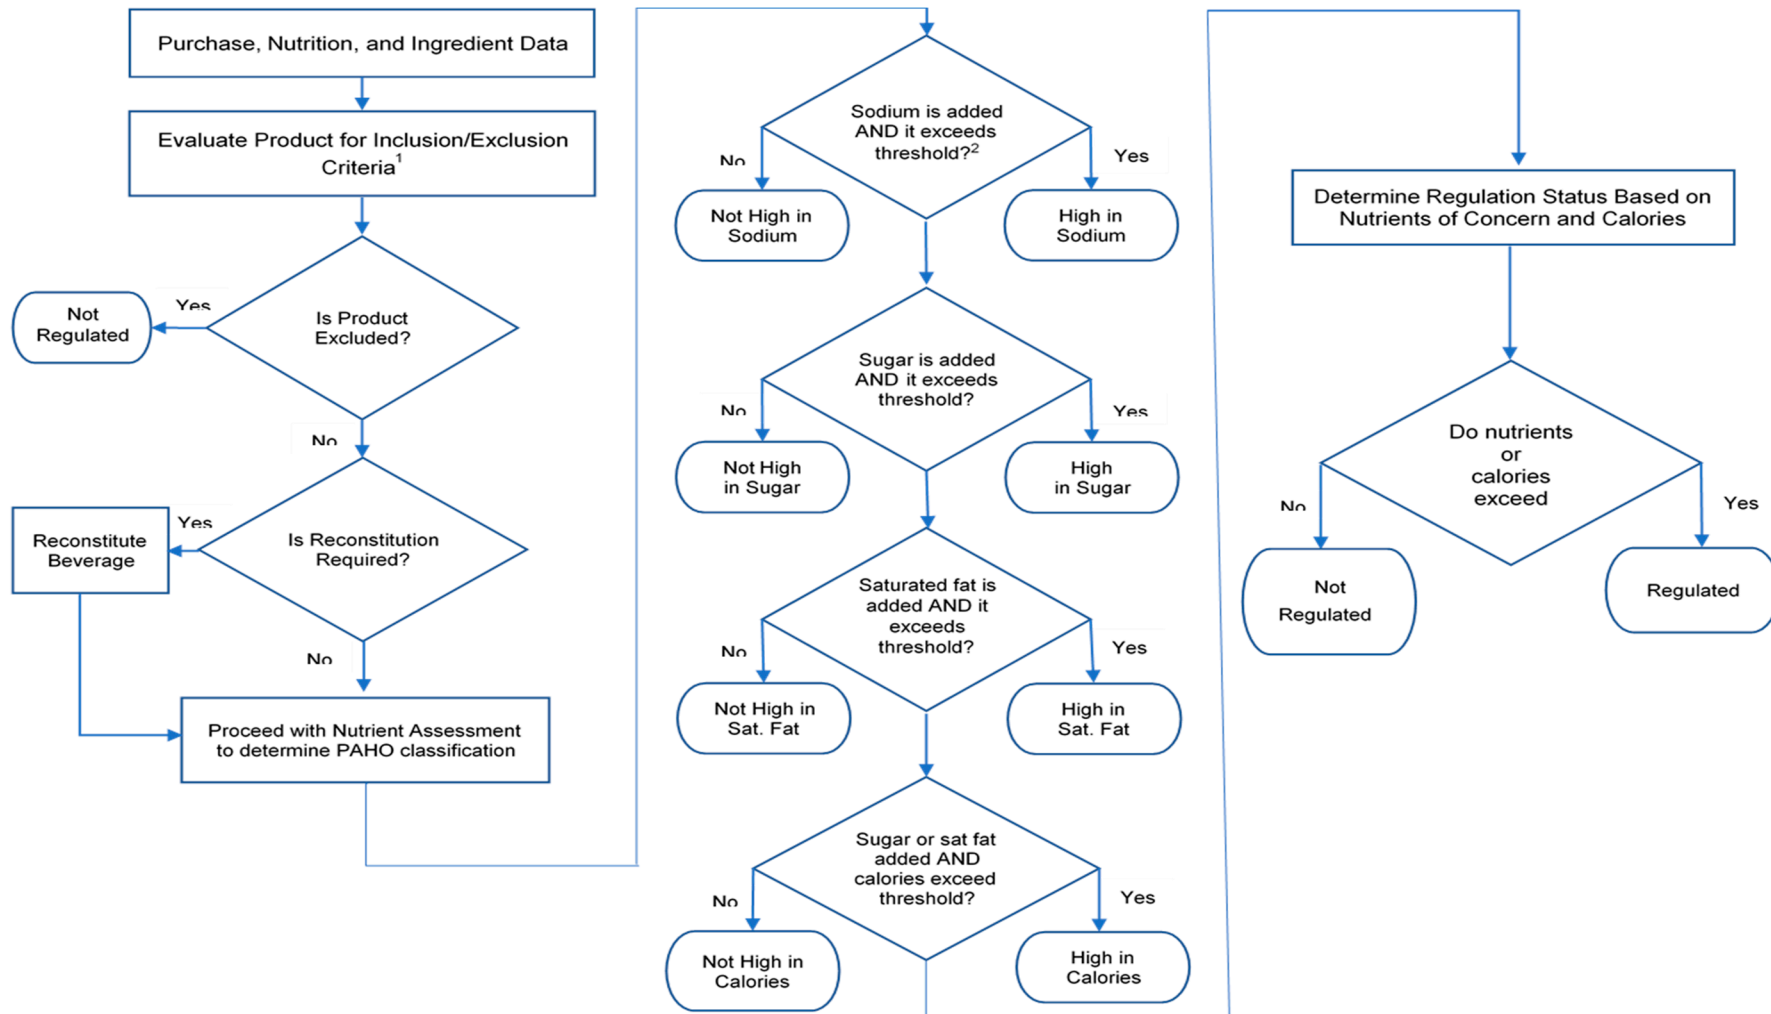

**Figure S2:** Algorithm used to evaluate Jamaican products for Chile Stage III nutrient profiling system

NOTES

1. Exclusion criteria in Chile regulations

- i. No added ingredients of concern (Search product ingredients using lists of ingredients representing added sugar, saturated fat, sodium/salt, etc. Lists of ingredients developed by Global Food Research Program based on various food databases, food manufacturing ingredients, policies, and regulations. Food items containing no ingredients of concern are excluded.)
- ii. Infant formula – ALL formulas are excluded from labelling and marketing regulations at this time due to gap in the Reglamento Sanitario De Los Alimentos (statement refers to formulas *beyond 4-6 months* without an upper age limit); This is to be corrected with updated regulations once Ley 20869 is actualized
  - 1. NAN formula products – none are regulated at this time (1/2018)
  - 2. Nido etapa formula products – none are regulated at this time (1/2018)
- iii. Fast foods, bulk or unpackaged food items, prepared meals even if packaged at time of sale
  - 1. NFP labels not currently on these items, thus labelling regulations do not currently apply
  - 2. These products are subject to advertising/marketing regulations if they contain added ingredients of concern that exceed thresholds
- iv. Commercial preparations of infant foods (coladas, picadas), unless they contain added sugar
- v. Processed cereal based baby food, unless they contain added sugar
- vi. Medical use products
- vii. Weight control products

2. Note that, for Jamaica, the assessment is based on the Chile-2019 nutrient thresholds.

| Chile - 2019 Nutrient Thresholds | Food | Beverage |
|----------------------------------|------|----------|
| Energy (kcal/100g)               | 275  | 70       |
| Total sugar (g/100g or ml)       | 10   | 5        |
| Sodium (mg/100g or ml)           | 400  | 100      |
| Saturated fat (g/100g or ml)     | 4    | 3        |

**Table S1:** Proportion of food/beverage products with various types and numbers “excess nutrients of concern” under the Pan American Health Organization nutrient profiling system

|                                        | N    | % "processed" | % excess sugar | % contains artificial sweetener | % excess sodium | % excess saturated fat | % excess total fat | % excess trans fat | Any excess nutrients | 2-3 excess nutrients | 4 or more excess nutrients |
|----------------------------------------|------|---------------|----------------|---------------------------------|-----------------|------------------------|--------------------|--------------------|----------------------|----------------------|----------------------------|
| <b>Beverages</b>                       | 1316 | 84.4          | 76.0           | 19.5                            | 17.0            | 2.8                    | 8.3                | 0.0                | 83.0                 | 16.6                 | 0.2                        |
| Sodas and flavored waters              | 894  | 96.8          | 91.3           | 22.5                            | 13.7            | 0.8                    | 1.4                | 0.0                | 95.6                 | 10.4                 | 0.0                        |
| Dairy drinks                           | 149  | 93.3          | 63.7           | 6.7                             | 42.3            | 18.2                   | 44.3               | 0.0                | 87.9                 | 55.0                 | 2.0                        |
| 100% juice and coconut waters          | 171  | 5.3           | 1.8            | 0.0                             | 3.5             | 0.0                    | 0.0                | 0.0                | 5.3                  | 0.0                  | 0.0                        |
| Other beverages                        | 102  | 96.1          | 84.3           | 45.1                            | 30.4            | 2.0                    | 29.4               | 0.0                | 95.1                 | 43.1                 | 0.0                        |
| <b>Foods</b>                           | 3423 | 93.6          | 50.4           | 4.5                             | 56.9            | 29.3                   | 41.8               | 2.3                | 90.1                 | 52.8                 | 3.7                        |
| Bread and bakery products              | 549  | 100.0         | 60.7           | 3.8                             | 52.0            | 32.1                   | 45.5               | 2.7                | 94.4                 | 56.8                 | 3.8                        |
| Candy and desserts                     | 376  | 99.7          | 86.4           | 19.1                            | 3.0             | 50.3                   | 56.9               | 5.9                | 88.0                 | 52.4                 | 6.4                        |
| Snack foods                            | 363  | 99.7          | 14.1           | 1.9                             | 59.8            | 46.0                   | 88.4               | 1.1                | 98.9                 | 71.9                 | 3.0                        |
| Ready to heat/eat foods                | 163  | 95.7          | 44.4           | 3.7                             | 79.5            | 36.6                   | 41.7               | 1.9                | 94.5                 | 55.8                 | 8.6                        |
| Cereal and grain products              | 242  | 66.1          | 47.5           | 2.1                             | 37.2            | 1.7                    | 6.6                | 0.0                | 61.2                 | 30.2                 | 0.0                        |
| Dairy products                         | 299  | 92.6          | 45.8           | 7.0                             | 46.8            | 46.5                   | 49.8               | 7.7                | 92.6                 | 44.1                 | 6.4                        |
| Fruits and vegetables                  | 195  | 90.8          | 48.7           | 3.1                             | 67.2            | 3.7                    | 8.4                | 0.0                | 89.7                 | 34.9                 | 0.0                        |
| Legumes                                | 103  | 79.6          | 37.3           | 0.0                             | 77.7            | 1.9                    | 1.9                | 0.0                | 77.7                 | 38.8                 | 0.0                        |
| Meat and eggs                          | 108  | 95.4          | 3.1            | 0.0                             | 91.7            | 79.1                   | 85.2               | 11.9               | 95.4                 | 79.6                 | 5.6                        |
| Fish and seafood                       | 106  | 100.0         | 11.4           | 0.9                             | 97.2            | 49.0                   | 72.6               | 0.0                | 99.1                 | 74.5                 | 3.8                        |
| Meat substitutes and dairy substitutes | 31   | 80.7          | 10.7           | 0.0                             | 58.1            | 12.9                   | 71.0               | 3.2                | 80.6                 | 58.1                 | 0.0                        |
| Sauces and spreads                     | 745  | 95.0          | 64.0           | 2.1                             | 70.6            | 16.1                   | 25.9               | 0.3                | 92.8                 | 56.1                 | 3.2                        |
| Dry spices and seasonings              | 143  | 86.7          | 37.0           | 0.0                             | 80.4            | 2.8                    | 4.9                | 0.0                | 81.8                 | 23.8                 | 1.4                        |
| <b>All Beverages and Foods</b>         | 4739 | 91.1          | 57.6           | 8.7                             | 45.9            | 21.9                   | 32.6               | 1.6                | 88.1                 | 42.8                 | 2.7                        |

Notes: See Appendix S1 for details on the PAHO Nutrient Profiling System algorithm and definitions

**Table S2:** Proportion of food/beverage products with various types and numbers “excess nutrients of concern” under the Chile Stage III nutrient profiling system

|                                        | N    | % containing added ingredients of concern | % excess sugar | % excess sodium | % excess saturated fat | % excess calories | Any excess nutrients | 2-3 excess nutrients | 4 or more excess nutrients |
|----------------------------------------|------|-------------------------------------------|----------------|-----------------|------------------------|-------------------|----------------------|----------------------|----------------------------|
| <b>Beverages</b>                       | 64.7 | 81.5                                      | 1.8            | 0.5             | 9.8                    | 66.8              | 9.3                  | 0.0                  | 64.7                       |
| Sodas and flavored waters              | 81.0 | 92.5                                      | 0.6            | 0.0             | 6.6                    | 81.5              | 6.6                  | 0.0                  | 81.0                       |
| Dairy drinks                           | 37.0 | 93.3                                      | 3.4            | 2.7             | 11.4                   | 39.6              | 12.1                 | 0.0                  | 37.0                       |
| 100% juice and coconut waters          | 1.8  | 5.3                                       | 2.9            | 0.0             | 0.0                    | 4.7               | 0.0                  | 0.0                  | 1.8                        |
| Other beverages                        | 66.7 | 96.1                                      | 8.8            | 2.0             | 52.0                   | 81.4              | 45.1                 | 0.0                  | 66.7                       |
| <b>Foods</b>                           | 42.4 | 92.3                                      | 47.4           | 23.3            | 44.7                   | 80.0              | 46.4                 | 2.0                  | 42.4                       |
| Bread and bakery products              | 58.5 | 100.0                                     | 48.7           | 37.8            | 82.3                   | 92.9              | 73.2                 | 5.6                  | 58.5                       |
| Candy and desserts                     | 86.1 | 89.4                                      | 2.1            | 52.7            | 63.3                   | 86.7              | 75.3                 | 0.5                  | 86.1                       |
| Snack foods                            | 16.3 | 99.7                                      | 68.6           | 59.2            | 96.1                   | 98.1              | 83.2                 | 5.0                  | 16.3                       |
| Ready to heat/eat foods                | 20.6 | 95.7                                      | 48.8           | 22.1            | 36.2                   | 65.0              | 38.7                 | 0.0                  | 20.6                       |
| Cereal and grain products              | 47.1 | 66.1                                      | 32.2           | 6.2             | 57.9                   | 62.4              | 54.5                 | 0.8                  | 47.1                       |
| Dairy products                         | 39.5 | 91.3                                      | 42.8           | 6.4             | 9.0                    | 82.9              | 10.4                 | 0.0                  | 39.5                       |
| Fruits and vegetables                  | 24.1 | 90.8                                      | 26.7           | 0.5             | 3.6                    | 46.7              | 6.7                  | 0.0                  | 24.1                       |
| Legumes                                | 6.9  | 79.6                                      | 12.6           | 0.0             | 1.9                    | 18.4              | 1.9                  | 0.0                  | 6.9                        |
| Meat and eggs                          | 0.0  | 95.4                                      | 82.4           | 0.9             | 8.3                    | 83.3              | 7.4                  | 0.0                  | 0.0                        |
| Fish and seafood                       | 1.9  | 100.0                                     | 56.6           | 5.7             | 1.9                    | 63.2              | 2.8                  | 0.0                  | 1.9                        |
| Meat substitutes and dairy substitutes | 10.7 | 80.6                                      | 51.6           | 9.7             | 25.8                   | 74.2              | 12.9                 | 0.0                  | 10.7                       |
| Sauces and spreads                     | 49.6 | 94.8                                      | 62.5           | 12.7            | 29.4                   | 85.2              | 43.0                 | 1.7                  | 49.6                       |
| Dry spices and seasonings              | 28.3 | 86.7                                      | 79.7           | 0.7             | 13.3                   | 81.8              | 18.2                 | 0.7                  | 28.3                       |
| <b>All Beverages and Foods</b>         | 4739 | 89.3                                      | 48.7           | 34.7            | 16.9                   | 35.0              | 76.3                 | 36.1                 | 1.4                        |

Notes: See Appendix S2 for details on the Chile Stage III Nutrient Profiling System algorithm and definitions
